# Supplementary material for: Interleukin 20 regulates dendritic cell migration and expression of co-stimulatory molecules
Source: PubMed Central journal article supplement (PMC4728801; doi:10.1186/s40591-016-0046-x), 2016-01-26

Fig. S1; Bech *et al.*

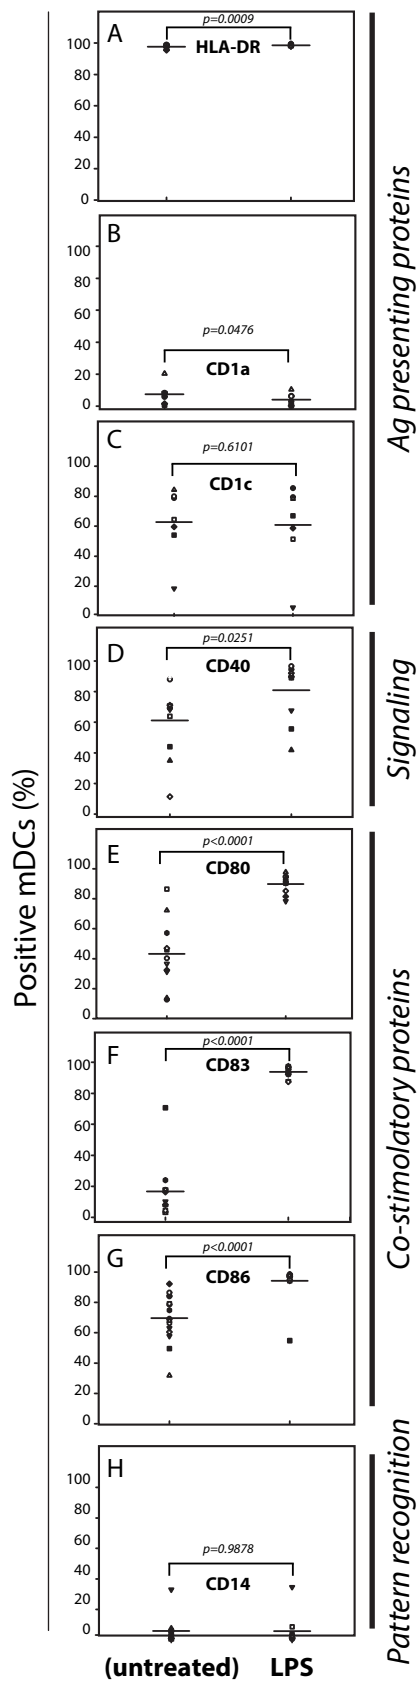

Supplement: 40591_2016_46_MOESM1_ESM.pdf [file 40591_2016_46_MOESM1_ESM.pdf]
